# Supplementary material
Source: PubMed Central journal article supplement (PMC3790506)
Supplement: supp_blood-2012-12-472076_blood-2012-12-472076-1.pdf [file supp_blood-2012-12-472076_blood-2012-12-472076-1.pdf]

### Supplemental Table 1. Necropsy of DN-IkTg mice

A total of 39 organs were examined. Those not mentioned in the table were found to be normal in both the WT and DN-IkTg mice.

| Organ          | WT                                               | DN-IkTg                                                                                                     |
|----------------|--------------------------------------------------|-------------------------------------------------------------------------------------------------------------|
| Cecum          | Normal                                           | Mild, focal GALT hyperplasia                                                                                |
| Femur, Marrow  | Normal                                           | Minimal, granulocytic hyperplasia                                                                           |
| Liver          | Minimal, subacute multifocal inflammation        | Mild, subacute multifocal inflammation                                                                      |
| LN, mandibular | Minimal, bilateral lymphoid hyperplasia          | Mild, unilateral histiocytosis<br>Moderate, bilateral lymphoid hyperplasia<br>Mild, bilateral plasmacytosis |
| LN, mesenteric | Minimal lymphoid hyperplasia                     | Mild lymphoid hyperplasia<br>Mild Plasmacytosis<br>Mild dendritic cell hyperplasia                          |
| Lung           | Normal                                           | Minimal, multifocal lymphocytic infiltrate<br>Minimal, focal thrombus                                       |
| Pancreas       | Normal                                           | Minimal, multifocal lymphocytic infiltrate<br>Minimal, focal acinar degeneration                            |
| Salivary Gland | Minimal, focal unilateral lymphocytic infiltrate | Mild, multifocal bilateral lymphocytic infiltrate                                                           |
| Spleen         | Normal                                           | Mild lymphoid hyperplasia                                                                                   |
| Thymus         | Normal                                           | Focal cysts present<br>Moderate, cortical lymphoid hyperplasia                                              |

## Supplemental Table 2. Apoptosis pathway PCR gene array

List shows differential gene expression of WT versus DN-IkTg CD4SP cells. Data are representative of three independent experiments.

| Gene      | Fold Change (over WT) | Gene      | Fold Change (over WT) | Gene     | Fold Change (over WT) |
|-----------|-----------------------|-----------|-----------------------|----------|-----------------------|
| Bag3      | 39.0608               | Tnfsf12   | 0.8971                | Polb     | 0.4499                |
| Birc5     | 3.6666                | Trp63     | 0.8971                | Bcl2l1   | 0.4297                |
| Bid       | 3.1449                | Trp73     | 0.8971                | Dffb     | 0.4252                |
| Hells     | 2.5608                | Xiap      | 0.8732                | Cflar    | 0.4103                |
| Casp3     | 2.0605                | Bok       | 0.8452                | Bnip3    | 0.3841                |
| Naip2     | 1.8295                | Sphk2     | 0.8324                | Birc2    | 0.3527                |
| Apaf1     | 1.6906                | Bnip2     | 0.8169                | Casp6    | 0.3296                |
| Cd40      | 1.6772                | Tnfrsf10b | 0.7886                | Casp7    | 0.3207                |
| Atf5      | 1.6441                | Trp53     | 0.7818                | Cradd    | 0.3144                |
| Nol3      | 1.5649                | Zc3hc1    | 0.7727                | Mcl1     | 0.3108                |
| Tnfsf10   | 1.4166                | Casp4     | 0.7664                | Casp9    | 0.309                 |
| Prdx2     | 1.3715                | Tsc22d3   | 0.7639                | Bnip3l   | 0.2736                |
| Bad       | 1.1356                | Rnf7      | 0.7544                | Bcl10    | 0.2324                |
| Bax       | 1.0949                | Api5      | 0.7487                | Pycard   | 0.2246                |
| Hprt1     | 1.0409                | Bak1      | 0.7418                | Tnf      | 0.2046                |
| Traf2     | 1.0266                | Akt1      | 0.722                 | Traf3    | 0.2025                |
| Bcl2l2    | 0.9757                | Dad1      | 0.7173                | Tnfrsf1a | 0.2008                |
| Bcl2l10   | 0.8971                | Gusb      | 0.7056                | Fasl     | 0.1893                |
| Card10    | 0.8971                | Cd70      | 0.6982                | Nfkb1    | 0.1787                |
| Casp1     | 0.8971                | Trp53bp2  | 0.6862                | Casp8    | 0.1437                |
| Casp12    | 0.8971                | Bag1      | 0.6665                | Cd40lg   | 0.1312                |
| Casp14    | 0.8971                | Fadd      | 0.6126                | Pim2     | 0.1214                |
| Cidea     | 0.8971                | Cideb     | 0.5391                | Dapk1    | 0.1196                |
| Il10      | 0.8971                | Trp53inp1 | 0.5389                | Birc3    | 0.1123                |
| Lhx4      | 0.8971                | Casp2     | 0.5326                | Card6    | 0.0727                |
| Naip1     | 0.8971                | Ltbr      | 0.5274                | Traf1    | 0.071                 |
| Nme5      | 0.8971                | Dffa      | 0.5043                | Bcl2     | 0.0682                |
| Pak7      | 0.8971                | Ripk1     | 0.4876                | Fas      | 0.0388                |
| Tnfrsf11b | 0.8971                | Nod1      | 0.4729                |          |                       |

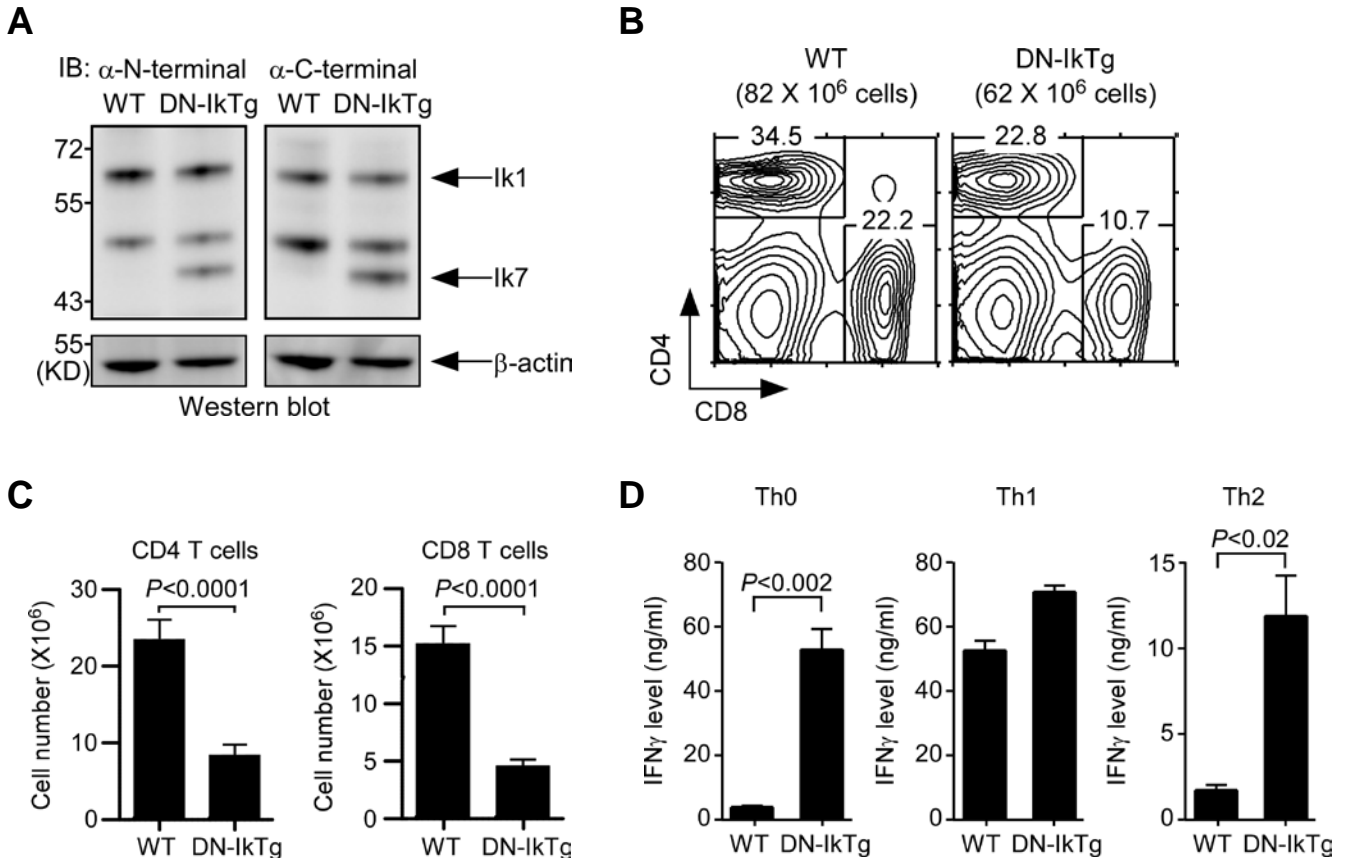

### Supplemental Figure 1. Transgenic DN-Ikaros expression in peripheral T cells.

**(A)** Immunoblot analysis of WT and DN-IkTg LN T cells. Whole T cell lysates were probed with Ikaros N-terminal (left) or C-terminal (right) specific antibodies. The same blot was reprobed with anti- $\beta$ -actin antibodies as loading control. Blots are representative of 3 independent experiments with 3 WT and 3 DN-IkTg mice.

**(B)** LN cell profiles of WT and DN-IkTg mice. CD4, CD8 profiles and total cell numbers were determined in single cell suspensions of WT and DN-IkTg LN cells. Data are representative of 8 independent experiments with each one WT and one DN-IkTg mouse.

**(C)** Peripheral LN T cell numbers of WT and DN-IkTg mice. Data are the summary of 8 independent experiments with each one WT and one DN-IkTg mouse. Bar graphs show mean number  $\pm$  SEM.

**(D)** *In vitro* T helper cell differentiation of WT and DN-IkTg CD4<sup>+</sup> T cells. Purified CD4<sup>+</sup> LNT cells were stimulated under Th0, Th1, or Th2 conditions for 5 days. IFN $\gamma$  levels in culture supernatants were measured by ELISA. Bar graphs show mean  $\pm$  SEM from three independent experiments.

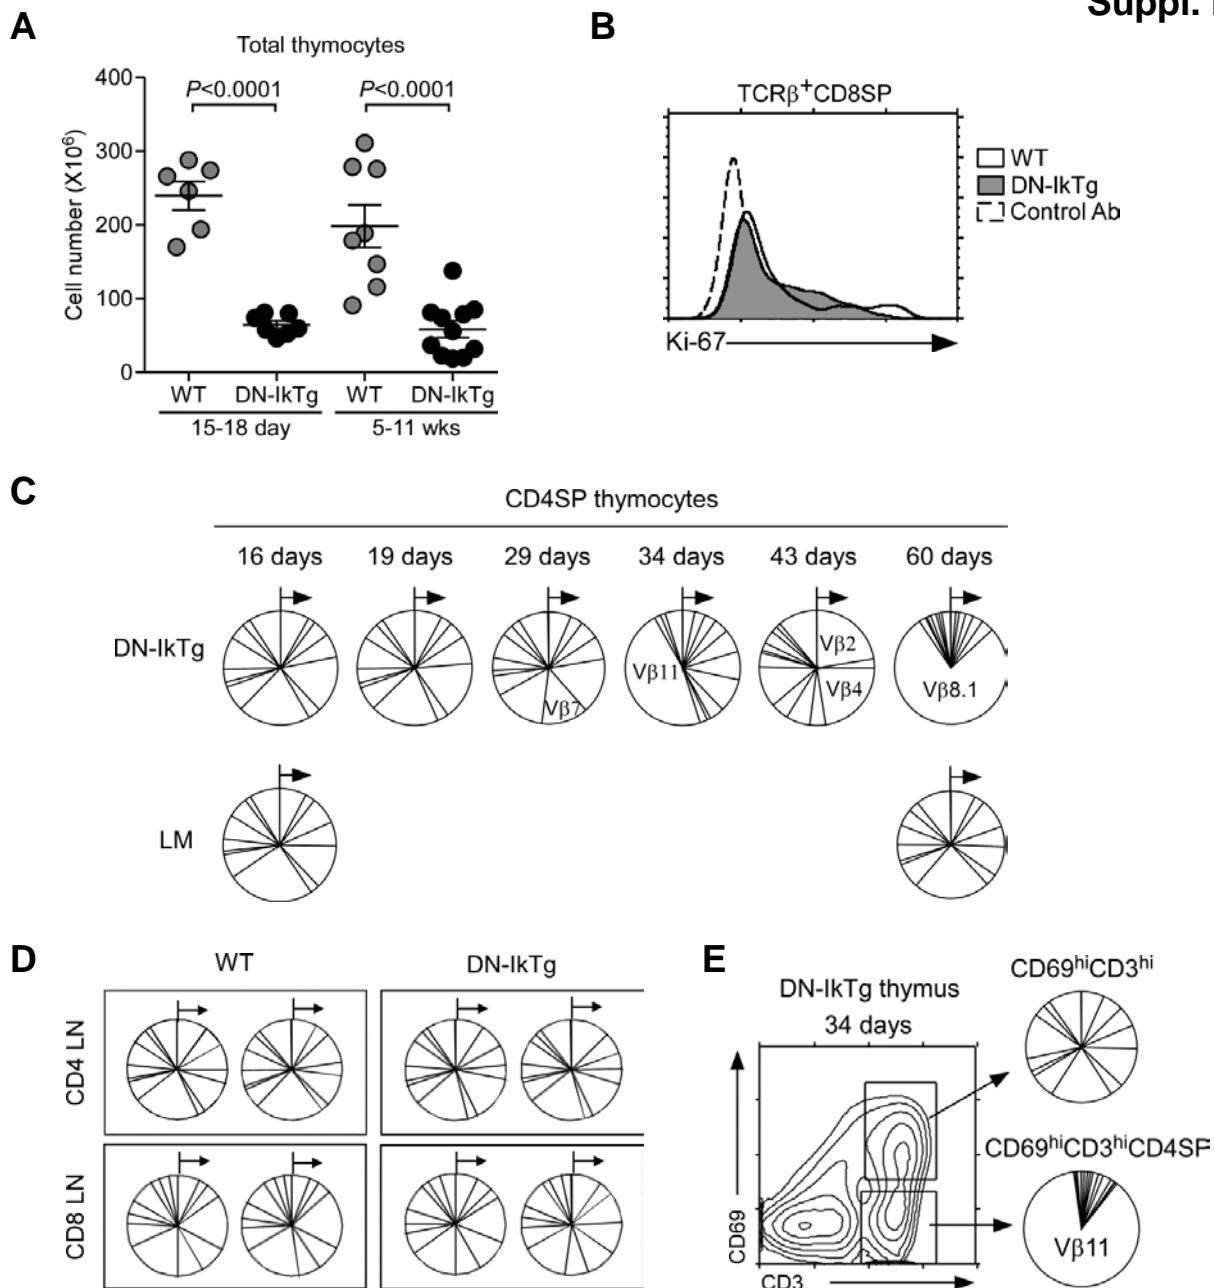

### Supplemental Figure 2. TCR V $\beta$ distribution in CD4<sup>+</sup> and CD8<sup>+</sup> LNT cells.

**(A)** Thymocyte numbers in neonate and adult DN-IkTg mice. Total thymocyte numbers were determined at indicated age. Each circle corresponds to an individual mouse.

**(B)** Intracellular Ki-67 staining of WT and DN-IkTg TCR $\beta^+$  CD8SP thymocytes. Histogram is representative of three independent experiments with 4 WT and 6 DN-IkTg mice.

**(C)** TCR V $\beta$  analysis of littermate (LM) and DN-IkTg CD4SP thymocytes with progressing age. CD4SP cells from indicated mice were stained for a panel of 15 different TCR V $\beta$ , starting from V $\beta$ 2 through V $\beta$ 17<sup>a</sup> in clockwise direction (Materials and Methods). Relative expression of individual TCR V $\beta$  chains are shown in pie charts for each individual mouse. Each chart represents an independent experiment.

**(D)** TCR V $\beta$  analysis of WT and DN-IkTg LNT cells. TCR V $\beta$  analysis with CD4<sup>+</sup> and CD8<sup>+</sup> LNT cells are shown in pie charts.

**(E)** TCR V $\beta$  analysis of the indicated thymocyte subpopulations in DN-IkTg mice. Total thymocytes were stained for CD69 and CD3, followed by CD4/CD8 analysis to assess TCR V $\beta$  distribution

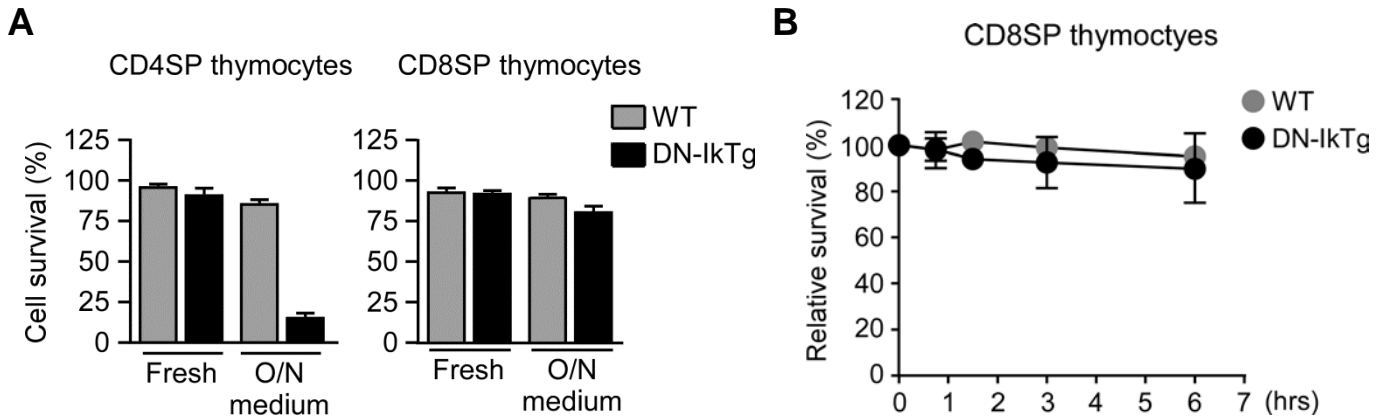

**Supplemental Figure 3. DN-IkTg induces apoptosis in CD4SP thymocytes.**

**(A)** Cell viability of freshly isolated versus overnight medium incubated DN-IkTg SP thymocytes. WT and DN-IkTg CD4SP and CD8SP thymocytes were assessed for cell survival by propidium iodide exclusion at indicated time points. Graph shows mean  $\pm$  SEM from three independent experiments with 3 WT and 6 DN-IkTg mice.

**(B)** Survival kinetics of WT and DN-IkTg CD8SP thymocytes *in vitro*. Data show the summary of three independent experiments with 3 WT and 6 DN-IkTg mice.

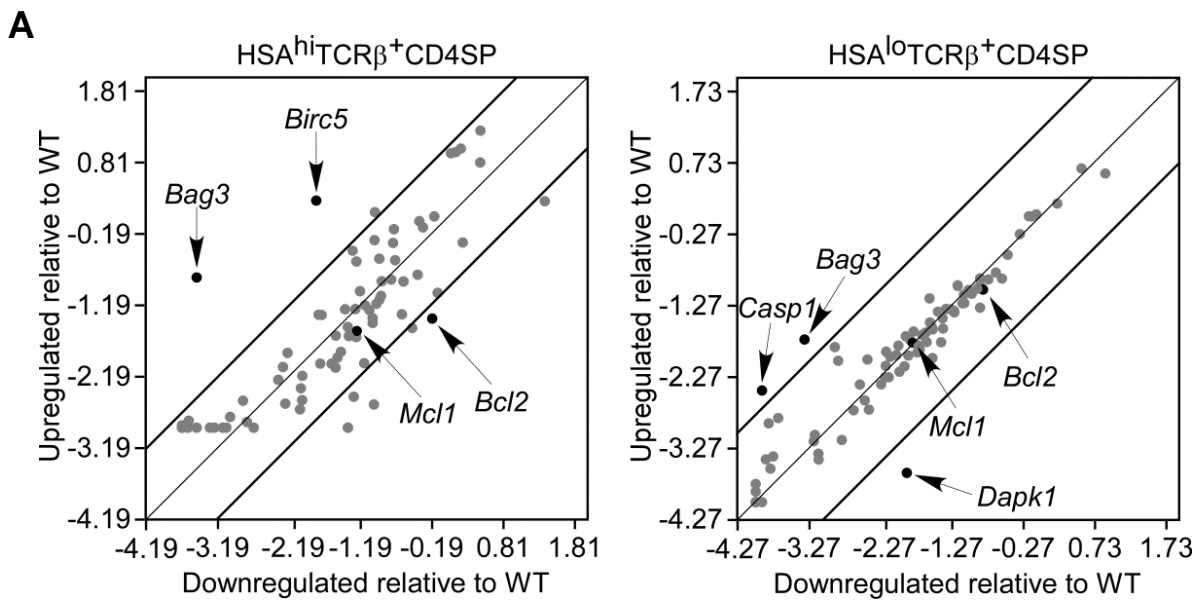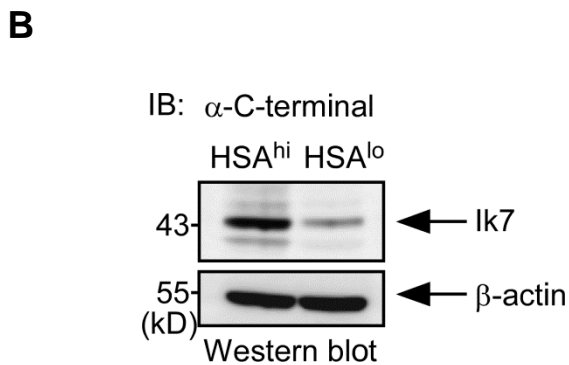

**Supplemental Figure 4. Developmentally distinct expression of pro-survival molecules in DN-IκTg thymocytes**

**(A)** Apoptosis pathway gene array analysis of sorted thymocyte subpopulations from WT and DN-IκTg mice. Total RNA from sorted WT or DN-IκTg cells were used to probe PCR arrays for expression of pro- and anti-apoptotic genes. Data are representative of two independent experiments using sorted CD4SP thymocytes from each 3 WT and 3 DN-IκTg mice.

**(B)** Immunoblot analysis of DN-IκTg expression. Whole cell lysates from sorted HSA<sup>hi</sup> and HSA<sup>lo</sup> TCRβ<sup>+</sup> DN-IκTg thymocytes were assessed for transgenic DN-IκTg expression. The same blot was reprobbed with anti-β-actin antibodies for loading control. Blot is representative of three independent experiments.

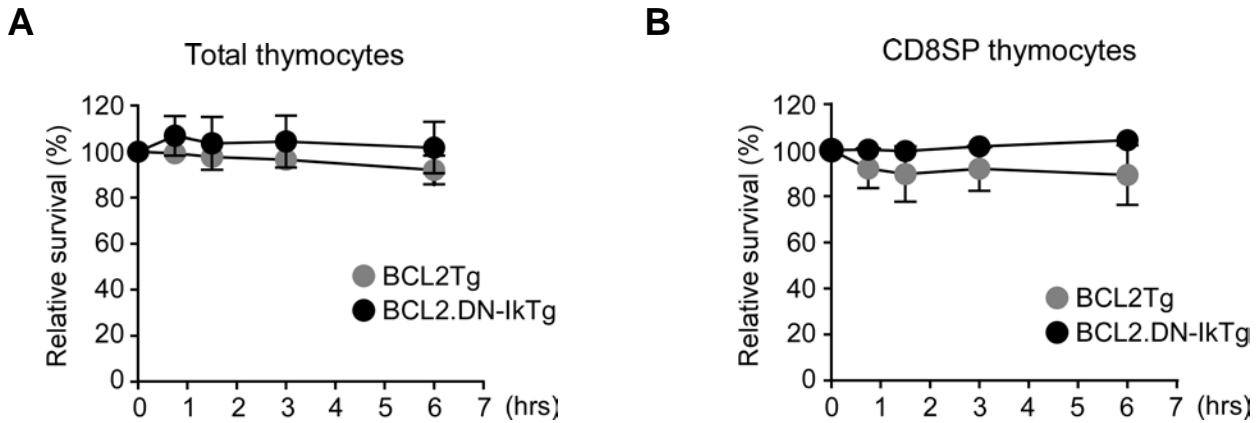

**Supplemental Figure 5. Transgenic Bcl-2 rescues programmed cell death in DN-IkTg thymocytes.**

**(A)** Survival kinetics of BCL2Tg and BCL2.DN-IkTg total thymocytes *in vitro*. Data show the summary of three independent experiments

**(B)** Survival kinetics of BCL2Tg and BCL2.DN-IkTg CD8SP thymocytes *in vitro*. Data show the summary of three independent experiments.

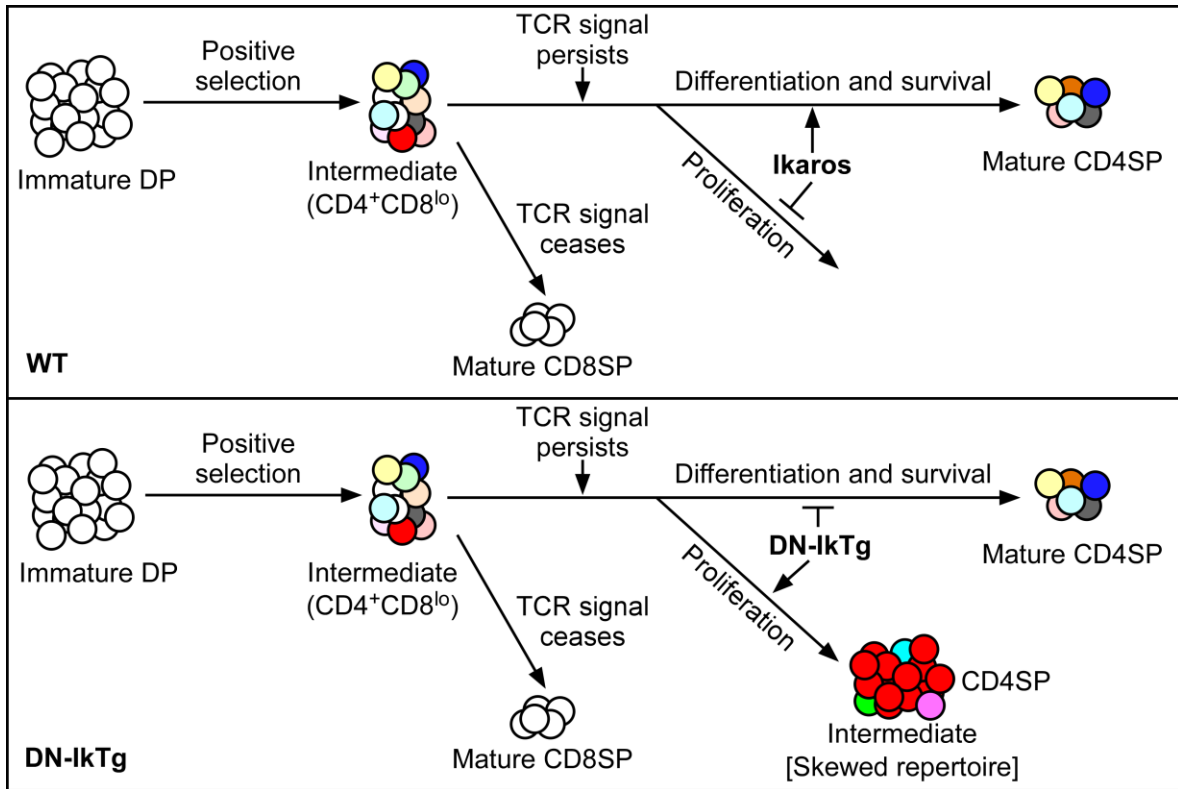

### Supplemental Figure 6. Ikaros controls the outcome of selecting TCR signals during thymocyte development

CD4<sup>+</sup>CD8<sup>lo</sup> intermediate cells can be generated by either MHC I or MHC II engagement of the TCR. However, the conspicuous absence of CD4SP cells in MHCIIKO.DN-IkTg mice revealed that DN-IkTg CD4SP cells were mostly dependent on MHCII. This raises the question why MHC I-specific TCR signals fail to induce accumulation of intermediate cells in DN-IkTg mice. According to the kinetic signaling model, persistent TCR signals such as in TCR/MHCII engagements will impose CD4 lineage choice while cessation of positive selecting TCR signals such as in TCR/MHC I engagements will drive CD8 lineage differentiation. Thus, TCR signaling in MHC I-specific CD4<sup>+</sup>CD8<sup>lo</sup> intermediate cells will be terminated upon positive selection and Ikaros function is not further required to control downstream effects of TCR signals (**top**). On the other hand, TCR signaling in MHCII-specific CD4<sup>+</sup>CD8<sup>lo</sup> intermediate cells will persist, and according to our results, it is the persistent TCR signaling that drives the clonal expansion and accumulation of intermediate cells in DN-IkTg thymocytes. Therefore, Ikaros function is required to constrain persistent TCR signals from inducing proliferation and apoptosis of MHCII-signaled CD4<sup>+</sup>CD8<sup>lo</sup> intermediate cells (**bottom**).
